# Supplementary material
Source: bioRxiv or medRxiv preprint supplement (https://www.biorxiv.org/highwire/filestream/67774/field_highwire_adjunct_files/0/157404-1.pdf)
Supplement: Supplementary file [file 157404-1.pdf]

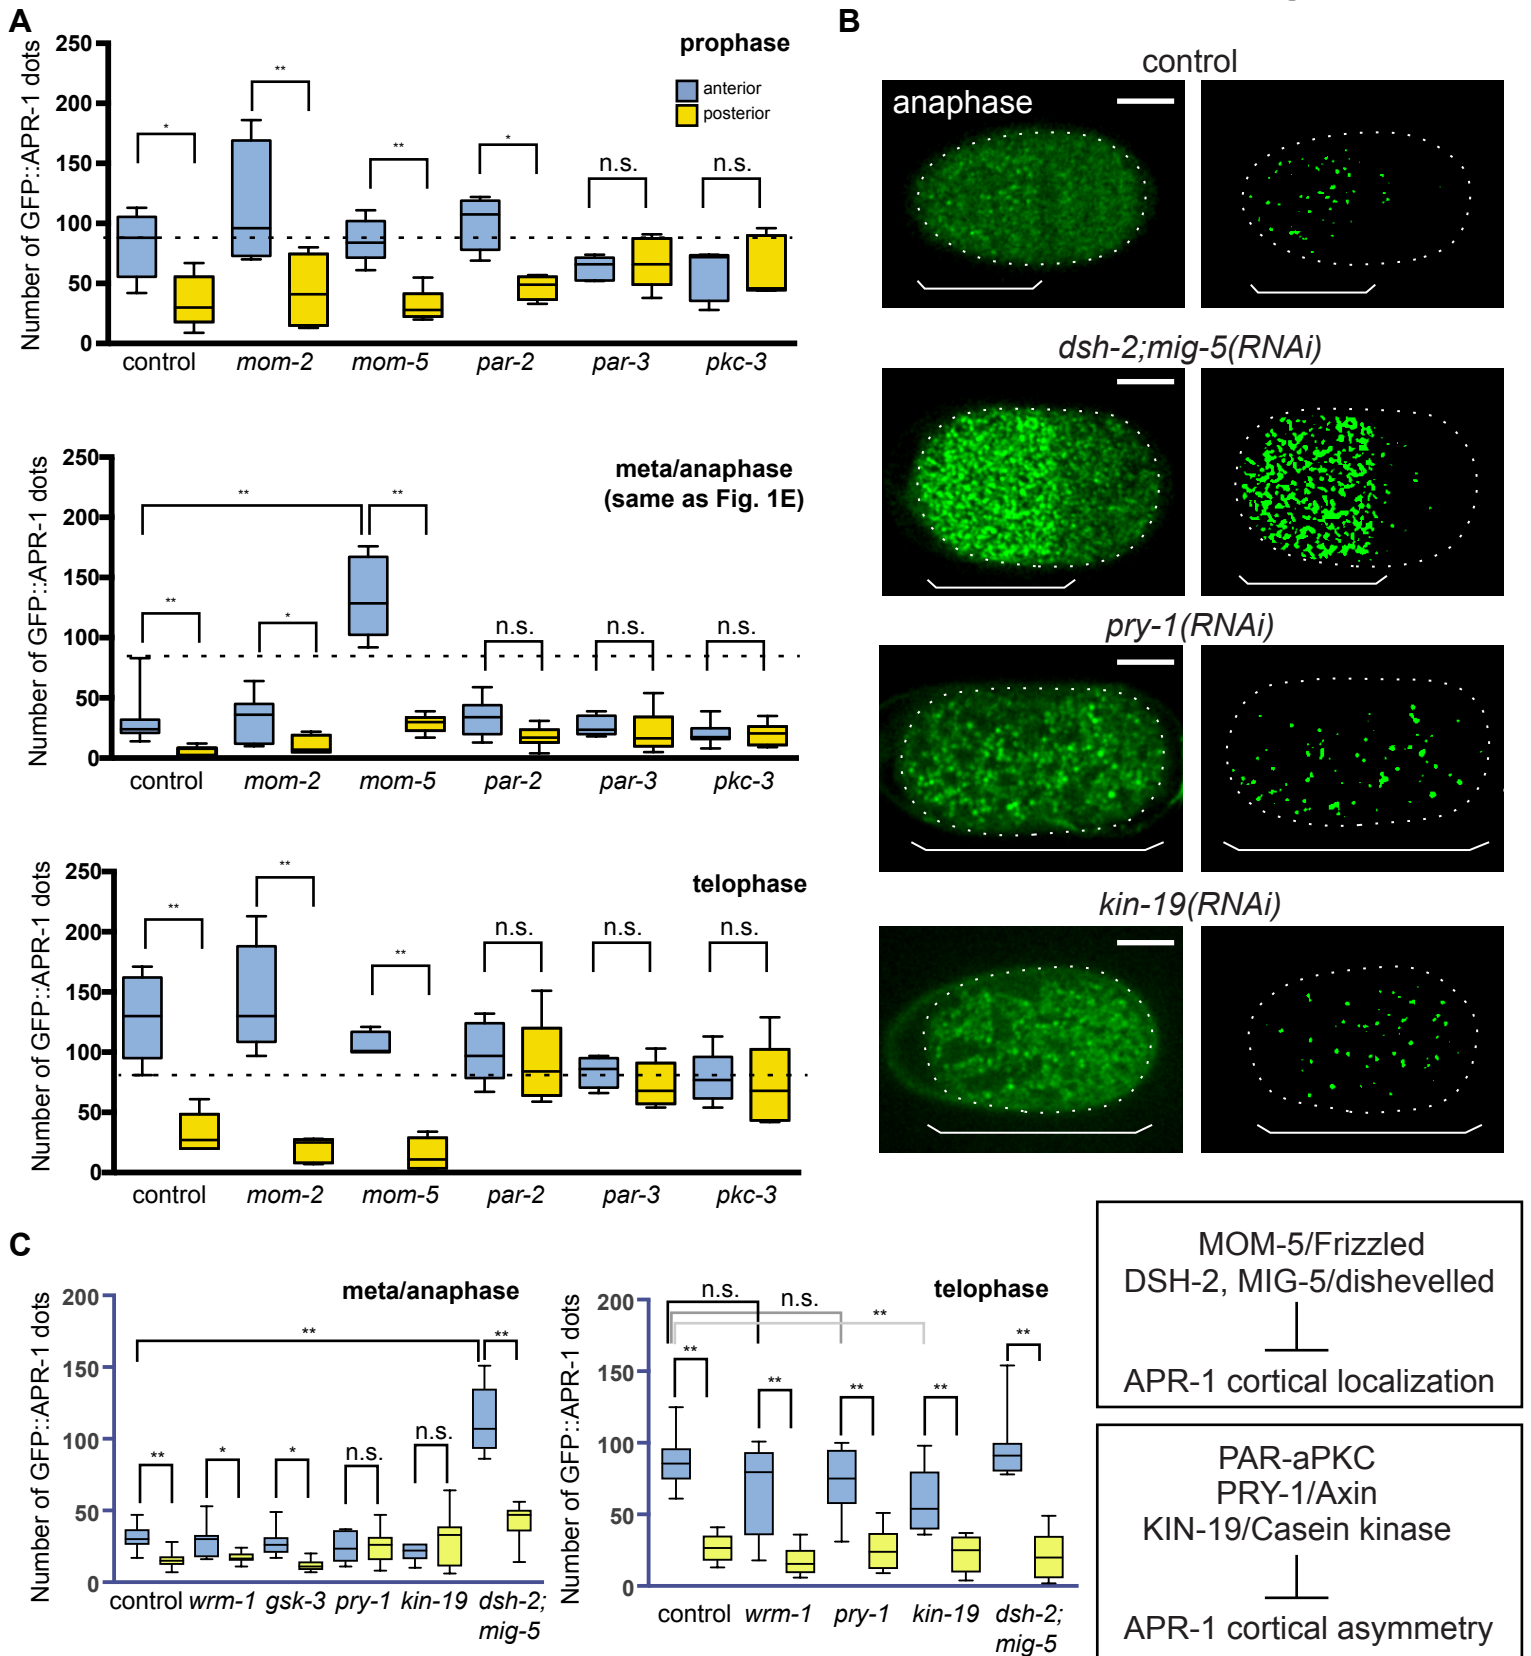

## Figure S1. Temporal and genetic regulation of cortical GFP::APR-1 localization

(A, C) Quantified numbers of GFP::APR-1 dots on the anterior and posterior cell cortex are shown for prophase, metaphase, anaphase and telophase of control and RNAi embryos. (B) APR-1 dots in the indicated RNAi experiments. Left and right panels are original and computationally segmented binary images, respectively. Ends of whiskers indicate minimum to maximum values. Double asterisk, asterisk and n.s. indicates:  $p < 0.01$ ,  $p < 0.05$  and  $p > 0.05$  (One-way ANOVA with Holm-Sidak's multiple comparison test). Scale bars indicate 10  $\mu\text{m}$ .
